# Supplementary material
Source: MDPI journal article supplement (https://www.mdpi.com/2073-4441/15/6/1228)
Supplement: s1 [file s1]

## Supplementary Materials for

### Photoinhibition of the Picophytoplankter *Synechococcus* Is Exacerbated by Ocean Acidification

He Li <sup>1</sup>, John Beardall <sup>2</sup>, Kunshan Gao<sup>1,3,\*</sup>

<sup>1</sup> State Key Laboratory of Marine Environmental Science, College of Ocean and Earth Sciences, Xiamen University, Xiamen 361102, China

<sup>2</sup> School of Biological Sciences, Monash University, Clayton, VIC 3800, Australia

<sup>3</sup> Co-Innovation Center of Jiangsu Marine Bio-industry Technology, Jiangsu Ocean University, Lianyungang 222000, China

\* Correspondence: ksgao@xmu.edu.cn

## Supplementary information

### Materials and Methods

The composition of SN15 medium contains 1 L seawater with 1 mL 4.41 M NaNO<sub>3</sub>, 1 mL 91.1 mM K<sub>2</sub>HPO<sub>4</sub>, 1 mL 13.7 mM Na<sub>2</sub>EDTA · 2H<sub>2</sub>O, 1 mL 98.1 mM Na<sub>2</sub>CO<sub>3</sub>, 1 mL 0.74 µM Vitamin B<sub>12</sub>, 1 mL cyano trace metal solution [400 mL distilled water, 100 mL 297 mM citric acid · H<sub>2</sub>O, 100 mL 229 mM ferric ammonium citrate, 100 mL 27 mM MnCl<sub>2</sub> · 4H<sub>2</sub>O, 100 mL 16.1 mM Na<sub>2</sub>MoO<sub>4</sub> · 2H<sub>2</sub>O, 100 mL 859 µM Co(NO<sub>3</sub>)<sub>2</sub> · 6H<sub>2</sub>O, 100 mL 7.72 mM ZnSO<sub>4</sub> · 7H<sub>2</sub>O].).

Table S1 Carbonate chemistry parameters in the cultures of *Synechococcus* CB0101 grown under different light levels combined with the ambient (AC, 415 µatm) or elevated *p*CO<sub>2</sub> (HC, 1000 µatm). The values are means ± SD of triplicate cultures. Different superscripted letters indicate significant (*p* < 0.05) differences among the treatments. CO<sub>2</sub>-light indicates the growth CO<sub>2</sub> and light levels.

| CO <sub>2</sub> -light | pH <sub>NBS</sub>      | TA<br>(µM)           | DIC<br>(µM)          | CO <sub>2</sub><br>(µM) | HCO <sub>3</sub> <sup>-</sup><br>(µM) | CO <sub>3</sub> <sup>-</sup><br>(µM) |
|------------------------|------------------------|----------------------|----------------------|-------------------------|---------------------------------------|--------------------------------------|
| AC-25                  | 7.94±0.01 <sup>a</sup> | 1259±12 <sup>a</sup> | 1177±13 <sup>a</sup> | 17.16±0.37 <sup>a</sup> | 1120±12 <sup>a</sup>                  | 40.27±0.12 <sup>a</sup>              |
| HC-25                  | 7.65±0.01 <sup>b</sup> | 1430±18 <sup>a</sup> | 1396±17 <sup>b</sup> | 39.38±0.34 <sup>b</sup> | 1331±16 <sup>b</sup>                  | 24.81±0.75 <sup>b</sup>              |
| AC-50                  | 7.94±0.01 <sup>a</sup> | 1278±6 <sup>a</sup>  | 1196±7 <sup>a</sup>  | 17.47±0.43 <sup>a</sup> | 1138±7 <sup>a</sup>                   | 40.81±0.50 <sup>a</sup>              |
| HC-50                  | 7.66±0.00 <sup>b</sup> | 1375±12 <sup>a</sup> | 1339±13 <sup>b</sup> | 37.02±0.56 <sup>b</sup> | 1278±12 <sup>b</sup>                  | 24.29±0.13 <sup>b</sup>              |
| AC-150                 | 7.97±0.01 <sup>a</sup> | 1255±7 <sup>a</sup>  | 1168±6 <sup>a</sup>  | 15.88±0.28 <sup>a</sup> | 1110±6 <sup>a</sup>                   | 42.72±0.81 <sup>a</sup>              |
| HC-150                 | 7.65±0.00 <sup>b</sup> | 1369±22 <sup>a</sup> | 1334±22 <sup>b</sup> | 37.48±0.39 <sup>b</sup> | 1273±21 <sup>b</sup>                  | 23.82±0.55 <sup>b</sup>              |
| AC-250                 | 7.99±0.01 <sup>a</sup> | 1267±7 <sup>a</sup>  | 1176±8 <sup>a</sup>  | 15.13±0.36 <sup>a</sup> | 1115±8 <sup>a</sup>                   | 45.31±0.51 <sup>a</sup>              |
| HC-250                 | 7.65±0.02 <sup>b</sup> | 1335±18 <sup>a</sup> | 1300±16 <sup>b</sup> | 36.90±1.06 <sup>b</sup> | 1240±16 <sup>b</sup>                  | 23.00±1.04 <sup>b</sup>              |
| AC-400                 | 7.97±0.01 <sup>a</sup> | 1255±7 <sup>a</sup>  | 1167±6 <sup>a</sup>  | 15.61±0.40 <sup>a</sup> | 1108±6 <sup>a</sup>                   | 43.36±1.14 <sup>a</sup>              |
| HC-400                 | 7.65±0.00 <sup>b</sup> | 1320±20 <sup>a</sup> | 1284±20 <sup>b</sup> | 35.98±0.75 <sup>b</sup> | 1226±19 <sup>b</sup>                  | 23.00±0.0.28 <sup>b</sup>            |
| AC-800                 | 7.97±0.01 <sup>a</sup> | 1277±6 <sup>a</sup>  | 1189±6 <sup>a</sup>  | 15.82±0.28 <sup>a</sup> | 1129±6 <sup>a</sup>                   | 44.37±0.52 <sup>a</sup>              |
| HC-800                 | 7.65±0.01 <sup>b</sup> | 1317±26 <sup>a</sup> | 1282±25 <sup>b</sup> | 36.48±0.29 <sup>b</sup> | 1223±24 <sup>b</sup>                  | 22.60±0.86 <sup>b</sup>              |

Table S2 The photochemical parameters derived from rapid light curves (Fig. S2) of *Synechococcus* cells grown under different light levels combined with the ambient (AC, 415  $\mu\text{atm}$ ) or elevated  $p\text{CO}_2$  (HC, 1000  $\mu\text{atm}$ ).  $\alpha$  (a.u.–arbitrary units),  $\text{rETR}_{\text{max}}$  (a.u.), and  $I_k$  ( $\mu\text{mol photons m}^{-2} \text{ s}^{-1}$ ) represents photosynthetic light-harvesting efficiency, maximum electron transport rate, and light saturation point, respectively. The values are mean  $\pm$  SD of triplicate cultures. Different superscripted letters indicate significant ( $p < 0.05$ ) differences among the treatments.

| AC                         | 25                | 50                | 150               | 250                | 400               | 800                |
|----------------------------|-------------------|-------------------|-------------------|--------------------|-------------------|--------------------|
| $\alpha$                   | 0.230 $\pm$ 0.010 | 0.228 $\pm$ 0.002 | 0.232 $\pm$ 0.009 | 0.215 $\pm$ 0.105  | 0.203 $\pm$ 0.010 | 0.167 $\pm$ 0.013  |
| $\text{rETR}_{\text{max}}$ | 98.25 $\pm$ 3.77  | 113.68 $\pm$ 4.18 | 190.08 $\pm$ 6.83 | 194.34 $\pm$ 12.19 | 197.03 $\pm$ 3.03 | 177.26 $\pm$ 14.66 |
| $I_k$                      | 414.6 $\pm$ 11.2  | 498.9 $\pm$ 14.2  | 818.8 $\pm$ 5.6   | 903.2 $\pm$ 33.7   | 974.2 $\pm$ 58.9  | 1063.1 $\pm$ 14.0  |
| HC                         |                   |                   |                   |                    |                   |                    |
| $\alpha$                   | 0.273 $\pm$ 0.017 | 0.242 $\pm$ 0.002 | 0.246 $\pm$ 0.003 | 0.260 $\pm$ 0.006  | 0.241 $\pm$ 0.006 | 0.181 $\pm$ 0.013  |
| $\text{rETR}_{\text{max}}$ | 118.90 $\pm$ 5.80 | 130.23 $\pm$ 1.96 | 217.27 $\pm$ 2.43 | 231.53 $\pm$ 3.05  | 229.62 $\pm$ 7.99 | 190.53 $\pm$ 8.74  |
| $I_k$                      | 435.0 $\pm$ 13.8  | 537.6 $\pm$ 5.59  | 881.6 $\pm$ 14.6  | 891.5 $\pm$ 20.3   | 952.8 $\pm$ 17.0  | 1051.5 $\pm$ 39.0  |

Table S3. Statistical analyses of physiological traits of *Synechococcus* CB0101 grown under different  $p\text{CO}_2$  and light combinations.

| Trait                                  | Factor                 | df | F value  | <i>p</i> value |
|----------------------------------------|------------------------|----|----------|----------------|
| Growth rate                            | $p\text{CO}_2$         | 1  | 166.377  | <0.001         |
|                                        | light                  | 5  | 3307.262 | <0.001         |
|                                        | $p\text{CO}_2$ * light | 5  | 10.492   | <0.001         |
| Chl <i>a</i>                           | $p\text{CO}_2$         | 1  | 2.841    | 0.105          |
|                                        | light                  | 5  | 313.380  | <0.001         |
|                                        | $p\text{CO}_2$ * light | 5  | 11.499   | <0.001         |
| Carbon fixation<br>(per cell)          | $p\text{CO}_2$         | 1  | 66.311   | <0.001         |
|                                        | light                  | 5  | 114.656  | <0.001         |
|                                        | $p\text{CO}_2$ * light | 5  | 21.335   | <0.001         |
| Carbon fixation<br>(per Chl <i>a</i> ) | $p\text{CO}_2$         | 1  | 34.571   | <0.001         |
|                                        | light                  | 5  | 108.706  | <0.001         |
|                                        | $p\text{CO}_2$ * light | 5  | 8.0304   | <0.001         |
| Yield                                  | $p\text{CO}_2$         | 1  | 120.754  | <0.001         |
|                                        | light                  | 5  | 606.776  | <0.001         |
|                                        | $p\text{CO}_2$ * light | 5  | 2.147    | 0.094          |
| $\alpha$                               | $p\text{CO}_2$         | 1  | 72.384   | <0.001         |
|                                        | light                  | 5  | 51.776   | <0.001         |
|                                        | $p\text{CO}_2$ * light | 5  | 3.270    | 0.033          |
| rETR                                   | $p\text{CO}_2$         | 1  | 101.320  | <0.001         |
|                                        | light                  | 5  | 246.707  | <0.001         |
|                                        | $p\text{CO}_2$ * light | 5  | 2.449    | 0.063          |
| $a^*$                                  | $p\text{CO}_2$         | 1  | 40.565   | <0.001         |
|                                        | light                  | 5  | 60.011   | <0.001         |
|                                        | $p\text{CO}_2$ * light | 5  | 14.659   | <0.001         |
| POC                                    | $p\text{CO}_2$         | 1  | 17.849   | <0.001         |
|                                        | light                  | 5  | 25.968   | <0.001         |
|                                        | $p\text{CO}_2$ * light | 5  | 3.809    | 0.011          |
| PON                                    | $p\text{CO}_2$         | 1  | 5.22388  | 0.031          |
|                                        | light                  | 5  | 26.69842 | <0.001         |
|                                        | $p\text{CO}_2$ * light | 5  | 2.8207   | 0.038          |
| C/N                                    | $p\text{CO}_2$         | 1  | 16.17083 | <0.001         |
|                                        | light                  | 5  | 30.28343 | <0.001         |
|                                        | $p\text{CO}_2$ * light | 5  | 5.20364  | 0.002          |

Table S4. Percentage inhibition of carbon fixation under elevated  $p\text{CO}_2$  under different light levels ( $\mu\text{mol photons m}^{-2} \text{ s}^{-1}$ ).

| Inhibition (%)    | 25      | 50     | 150     | 250    | 400   | 800    |
|-------------------|---------|--------|---------|--------|-------|--------|
| CF(cell)          | -21±20% | -4±11% | -10±17% | 39±8%  | 46±1% | 38±27% |
| CF(Chl <i>a</i> ) | -26±19% | -2±10% | -0±20%  | 26±12% | 32±6% | 38±27% |

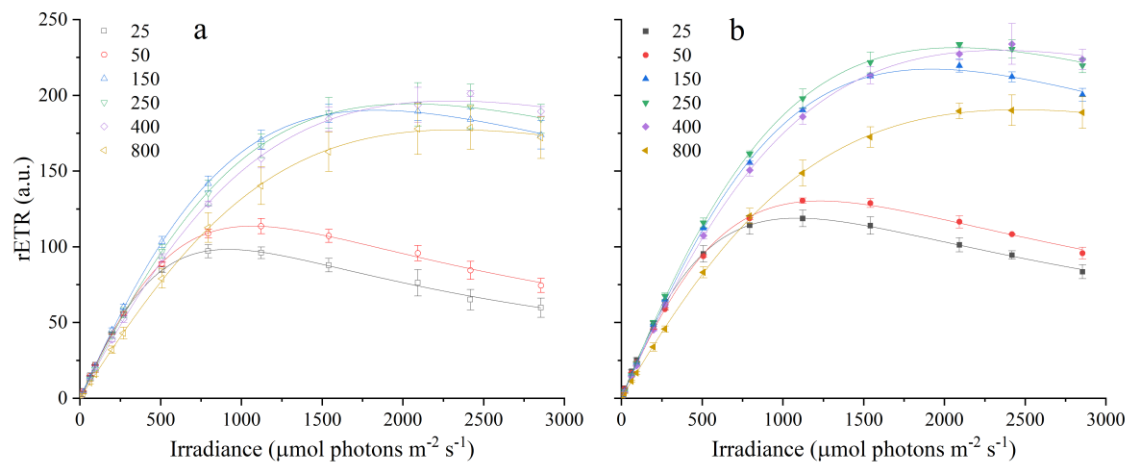

Figure S1 Rapid light curve (RLC) of *Synechococcus* CB0101 grown under different light levels combined with the ambient (AC, 415  $\mu\text{atm}$ ) (**a**) or elevated  $p\text{CO}_2$  (HC, 1000  $\mu\text{atm}$ ) (**b**). The values are mean  $\pm$  SD of triplicate cultures ( $n = 3$ ). Principal component analysis (PCA) of the RLC data showed a strong clustering along PC1, which explains 96.54% of the variance in the data set (Figure S4, upper panel). It demonstrated that rETR is higher for HC conditions except at 800  $\mu\text{mol photons m}^{-2} \text{s}^{-1}$ .

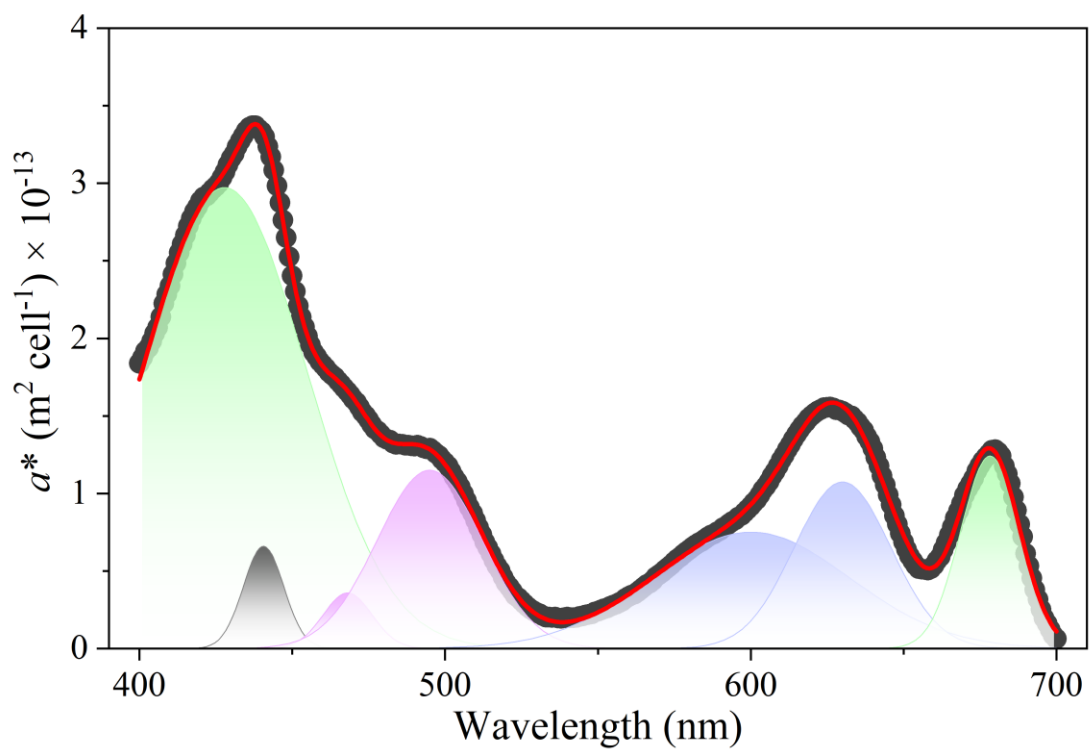

Figure S2 An example of decomposition of the absorption spectra  $a^*(\lambda)$  by a series of Gaussian curves. Black dots are measured values of  $a^*$ , different colors are the Gauss peak spectra used to decompose the  $a^*$  spectrum, and the red line is the sum of all Gaussian curves.

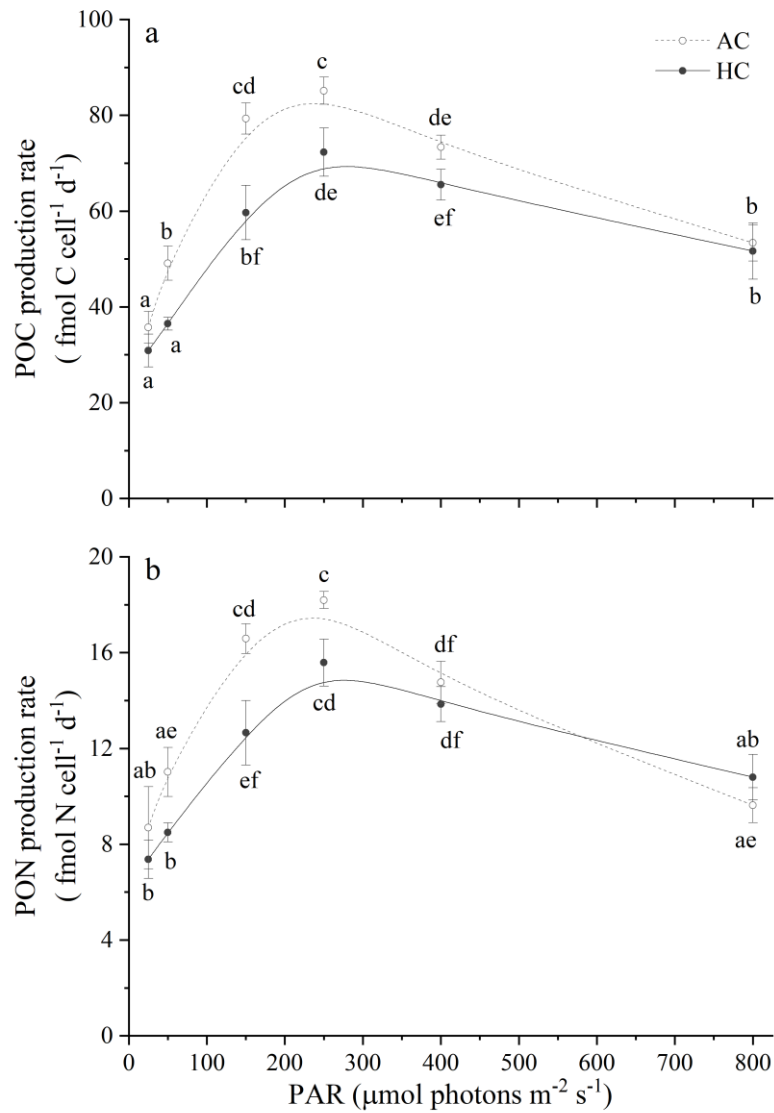

Figure S3 Particulate organic carbon (POC) **(a)** and nitrogen (PON) production rates **(b)** of *Synechococcus* cells grown under different light levels combined with the ambient (AC, 415  $\mu\text{atm}$ ) or elevated  $p\text{CO}_2$  (HC, 1000  $\mu\text{atm}$ ). The production rates of POC or PON were calculated by multiplying the cellular quota by corresponding specific growth rates ( $\text{d}^{-1}$ ). The values are means  $\pm$  SD of triplicate cultures. Different letters indicate significant ( $p < 0.05$ ) differences among the treatments.



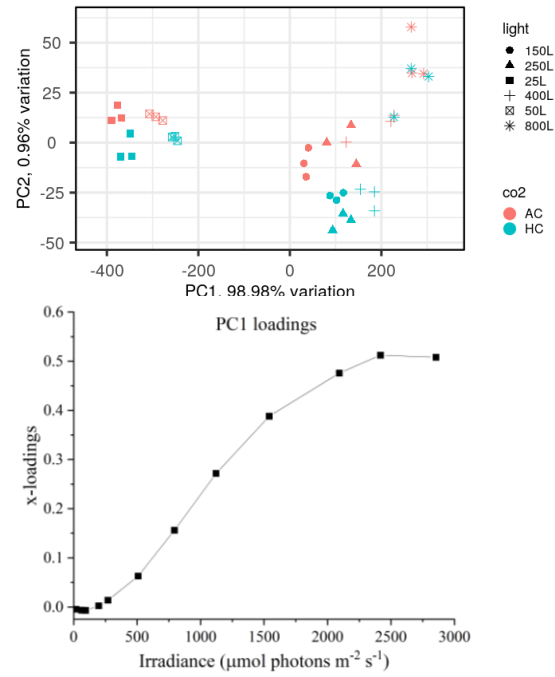

Figure S4 PCA analysis of rETR vs Irradiance data from Fig. S1 for all treatments. The upper panel (scores plot) shows clustering of treatments indicating effects of CO<sub>2</sub> levels in all light intensities except 800  $\mu\text{mol photons m}^{-2} \text{s}^{-1}$ . The loadings plot (lower) indicates that the clustering in the scores was due mostly to values at higher irradiance.
